# Supplementary material for: With a Little Help from My Friends: Profiles of Perceived Social Support and Their Associations with Adolescent Mental Health
Source: Springer Nature journal article supplement (doi:10.1007/s10826-023-02677-y), 2023-09-28
Supplement: MOESM1 [file 26102690]

| **Online Resource 1**  ***Prevalence and Mean Social Support Item Scores for Each Social Support Profile*** | | | | | | |
| --- | --- | --- | --- | --- | --- | --- |
|  | Males | | | Females | | |
| Social support profile | high | moderate | low friend | high | moderate | low friend |
| Prevalence | n = 589 (54%) | n = 342 (32%) | n = 151 (14%) | n = 585 (56%) | n = 303 (29%) | n = 165 (16%) |
| Social support item and mean score | | | | | |  |
| **Classmate support** |  |  |  |  |  |  |
| *enjoy being together* | 4.39 | 3.70 | 3.55 | 4.10 | 3.65 | 3.32 |
| *kind/helpful* | 4.38 | 3.64 | 3.40 | 4.18 | 3.74 | 3.24 |
| *accept me* | 4.49 | 3.73 | 3.37 | 4.14 | 3.60 | 3.00 |
| **Teacher support** |  |  |  |  |  |  |
| *accept me* | 4.51 | 3.71 | 3.72 | 4.36 | 3.73 | 3.52 |
| *care about me* | 4.34 | 3.39 | 3.38 | 4.02 | 3.42 | 3.18 |
| *trust* | 4.29 | 3.27 | 3.23 | 3.86 | 3.22 | 2.87 |
| **Family support** |  |  |  |  |  |  |
| *tries to help* | 4.87 | 4.22 | 4.06 | 4.90 | 3.89 | 3.94 |
| *get emotional help* | 4.84 | 4.05 | 3.87 | 4.86 | 3.73 | 3.66 |
| *talk about problems* | 4.72 | 3.75 | 3.72 | 4.71 | 3.49 | 3.35 |
| *help make decisions* | 4.76 | 4.07 | 3.92 | 4.80 | 3.81 | 3.82 |
| **Friend support** |  |  |  |  |  |  |
| *try to help* | 6.57 | 5.81 | 3.27 | 6.54 | 6.07 | 3.66 |
| *count on* | 6.68 | 5.99 | 3.26 | 6.60 | 6.16 | 3.51 |
| *share sorrow/joy with* | 6.70 | 6.01 | 3.23 | 6.74 | 6.44 | 3.58 |
| *talk about problems* | 6.55 | 5.85 | 2.92 | 6.60 | 6.25 | 3.22 |

*Note.* classmate, teacher and family support items are on a scale of 1-5 and friend support items are on a scale of 1-7.

**Online Resource 2**

***Covariate Sensitivity Analyses***

Multiple sensitivity analyses were conducted for covariate results, specifically when different scoring systems were used for Short Warwick-Edinburgh Mental wellbeing Scale (SWEMWBS):

1 = SWEMWBS 6-item (total of 6 items when relationship item removed)

2 = SWEMWBS 7-Item (total score for all items)

3 = Converted SWEMWBS 7 (7-item scores converted using authors conversion table based on Scottish adult sample)

4 = Converted SWEMWBS DK (7-item scores converted using conversion table based on Danish HBSC data)

and when the ‘Unclassified’ occupational class was treated as:

(A) a distinct group

(B) missing data (deleted listwise)

(C) missing data (imputed using full information maximum likelihood [FIML] estimation).

**Results for the Male Sample**

| ***1A) Mean mental health scores per social support profile******, when using SWEMWBS 6-item and the unclassified occupational class is treated as a distinct group*** | | | |
| --- | --- | --- | --- |
|  | High (a) | Moderate (b) | Low friend (c) |
| SWEMWBS 6 | 25.74bc | 23.27ac | 21.55ab |
| Sad frequency | 1.18bc | 1.98a | 1.87a |
| Irritable frequency | 1.79bc | 2.78a | 2.77a |
| Nervous frequency | 1.67bc | 2.42a | 2.26a |
| *Note.* superscript letters indicate a significant difference (*p* < .01) when compared to the lettered profile.  SWEMWBS= Shorter Warwick-Edinburgh Mental Wellbeing Scale | | | |

| ***1B) Mean mental health scores per social support profile, when using SWEMWBS 6-item*** ***and the unclassified occupational class is treated as missing data (deleted list-wise)*** | | | |
| --- | --- | --- | --- |
|  | High (a) | Moderate (b) | Low friend (c) |
| SWEMWBS 6 | 25.75bc | 23.25ac | 21.61ab |
| Sad frequency | 1.20bc | 1.97a | 1.91a |
| Irritable frequency | 1.82bc | 2.75a | 2.84a |
| Nervous frequency | 1.66bc | 2.42a | 2.29a |
| *Note.* superscript letters indicate a significant difference (p < .01) when compared to the lettered profile.  SWEMWBS= Shorter Warwick-Edinburgh Mental Wellbeing Scale | | | |

| ***1C) Mean mental health scores per social support profile, when using SWEMWBS 6-item and the unclassified occupational class is treated as missing data (imputed using FIML)*** | | | |
| --- | --- | --- | --- |
|  | High social support (a) | Moderate social support (b) | Low friend (c) |
| SWEMWBS 6 | 25.79bc | 23.26ac | 21.54ab |
| Sad frequency | 1.18bc | 1.98a | 1.85a |
| Irritable frequency | 1.78bc | 2.78a | 2.74a |
| Nervous frequency | 1.66bc | 2.42a | 2.28a |
| Note. superscript letters indicate a significant difference (p < .01) when compared to the lettered profile.  SWEMWBS= Shorter Warwick-Edinburgh Mental Wellbeing Scale | | | |

| ***2A) Mean mental health scores per social support profile, when using SWEMWBS 7-item total and the unclassified occupational class is treated as a distinct group*** | | | |
| --- | --- | --- | --- |
|  | High (a) | Moderate (b) | Low friend (c) |
| SWEMWBS 7 | 30.13 bc | 27.16ac | 24.84ab |
| Sad frequency | 1.16 bc | 1.97a | 1.88a |
| Irritable frequency | 1.80 bc | 2.77a | 2.77a |
| Nervous frequency | 1.67 bc | 2.42a | 2.26a |
| *Note. superscript letters indicate a significant difference (p < .01) when compared to the lettered profile.*  *SWEMWBS= Shorter Warwick-Edinburgh Mental Wellbeing Scale* | | | |

| ***2B)*** *Mean mental health scores per social support profile, when using*  *SWEMWBS 7-item and the unclassified occupational class is treated as missing data (deleted list-wise)* | | | |
| --- | --- | --- | --- |
|  | High (a) | Moderate (b) | Low friend (c) |
| SWEMWBS 7 | 30.15 bc | 27.13ac | 24.91ab |
| Sad frequency | 1.20 bc | 1.97a | 1.92a |
| Irritable frequency | 1.83 bc | 2.74a | 2.85a |
| Nervous frequency | 1.67 bc | 2.41a | 2.29a |
| *Note*. superscript letters indicate a significant difference (p < .01) when compared to the lettered profile.  SWEMWBS= Shorter Warwick-Edinburgh Mental Wellbeing Scale | | | |

| ***2C) Mean mental health scores per social support profile, when using SWEMWBS 7-item and the unclassified occupational class is treated as missing data (imputed using FIML)*** | | | |
| --- | --- | --- | --- |
|  | High (a) | Moderate (b) | Low friend (c) |
| SWEMWBS 7 | 30.178bc | 27.15ac | 24.81ab |
| Sad frequency | 1.182bc | 1.97a | 1.86a |
| Irritable frequency | 1.782bc | 2.77a | 2.75a |
| Nervous frequency | 1.66 bc | 2.41a | 2.28a |
| *Note.* superscript letters indicate a significant difference (p < .01) when compared to the lettered profile.  SWEMWBS= Shorter Warwick-Edinburgh Mental Wellbeing Scale | | | |

| ***3A) Mean mental health scores per social support profile when using converted SWEMWBS and the unclassified occupational class is treated as a distinct group*** | | | |
| --- | --- | --- | --- |
|  | High (a) | Moderate (b) | Low friend (c) |
| Converted SWEMWBS 7 | 27.85 bc | 24.04a | 23.67a |
| Sad frequency | 1.19 bc | 1.92a | 1.97a |
| Irritable frequency | 1.83 bc | 2.70a | 2.81a |
| Nervous frequency | 1.68 bc | 2.40a | 2.27a |
| *Note*. superscript letters indicate a significant difference (p < .01) when compared to the lettered profile.  SWEMWBS= Shorter Warwick-Edinburgh Mental Wellbeing Scale | | | |

| ***3B) Mean mental health scores per social support profile, when using converted SWEMWBS converted and the unclassified occupational class is treated as missing data (deleted list-wise)*** | | | |
| --- | --- | --- | --- |
|  | High (a) | Moderate (b) | Low friend (c) |
| Converted SWEMWBS 7 | 27.81 bc | 24.43a | 22.95a |
| Sad frequency | 1.20 bc | 1.96a | 1.93a |
| Irritable frequency | 1.84 bc | 2.71a | 2.85a |
| Nervous frequency | 1.67 bc | 2.40a | 2.30a |
| Note. superscript letters indicate a significant difference (p < .01) when compared to the lettered profile.  SWEMWBS= Shorter Warwick-Edinburgh Mental Wellbeing Scale | | | |

| ***3C) Mean mental health scores per social support profile, when using converted SWEMWBS and the unclassified occupational class is treated as missing data (imputed using FIML)*** | | | |
| --- | --- | --- | --- |
|  | High (a) | Moderate (b) | Low friend (c) |
| Converted SWEMWBS 7 | 27.92 bc | 24.03a | 23.59a |
| Sad frequency | 1.19 bc | 1.92a | 1.94a |
| Irritable frequency | 1.82 bc | 2.69a | 2.77a |
| Nervous frequency | 1.67 bc | 2.39a | 2.29a |
| *Note*. superscript letters indicate a significant difference (p < .01) when compared to the lettered profile.  SWEMWBS= Shorter Warwick-Edinburgh Mental Wellbeing Scale | | | |

| **4A) *Mean mental health scores per social support profile,* *when using converted SWEMWBS DK and the unclassified occupational class is treated as a distinct group*** | | | |
| --- | --- | --- | --- |
|  | High (a) | Moderate (b) | Low friend (c) |
| SWEMWBS DK | 27.53 bc | 23.76ac | 21.86ab |
| Sad frequency | 1.18 bc | 1.97a | 1.88a |
| Irritable frequency | 1.80 bc | 2.76a | 2.77a |
| Nervous frequency | 1.67 bc | 2.41a | 2.26a |
| *Note. superscript letters indicate a significant difference (p < .01) when compared to the lettered profile.*  *SWEMWBS= Shorter Warwick-Edinburgh Mental Wellbeing Scale* | | | |

| ***4B) Mean mental health scores per social support profile, when using converted SWEMWBS DK and the unclassified occupational class is treated as missing data (deleted list-wise)*** | | | |
| --- | --- | --- | --- |
|  | High (a) | Moderate (b) | Low friend (c) |
| SWEMWBS DK | 27.58 bc | 23.71a | 21.83a |
| Sad frequency | 1.20 bc | 1.96a | 1.92a |
| Irritable frequency | 1.84 bc | 2.72a | 2.84a |
| Nervous frequency | 1.67 bc | 2.40a | 2.29a |
| *Note. superscript letters indicate a significant difference (p < .01) when compared to the lettered profile.*  *SWEMWBS= Shorter Warwick-Edinburgh Mental Wellbeing Scale* | | | |

| ***4C) Mean mental health scores per social support profile, when using converted SWEMWBS DK and the unclassified occupational class is treated as missing data (imputed using FIML)*** | | | |
| --- | --- | --- | --- |
|  | High (a) | Moderate (b) | Low friend (c) |
| SWEMWBS DK | 27.60 bc | 23.74ac | 21.83ab |
| Sad frequency | 1.18 bc | 1.97a | 1.86a |
| Irritable frequency | 1.79 bc | 2.75a | 2.75a |
| Nervous frequency | 1.66 bc | 2.40a | 2.28a |
| *Note. superscript letters indicate a significant difference (p < .01) when compared to the lettered profile.*  *SWEMWBS= Shorter Warwick-Edinburgh Mental Wellbeing Scale* | | | |

**Results for the female sample**

| ***1A)*** *Mean mental health scores per social support profile when using SWEMWBS 6-item and the unclassified occupational class is treated as a distinct group* | | | |
| --- | --- | --- | --- |
|  | High (a) | Moderate (b) | Low friend (c) |
| SWEMWBS 6 | 23.99 bc | 21.65ac | 19.09ab |
| Sad frequency | 1.94 bc | 2.65ac | 3.09ab |
| Irritable frequency* | 2.40 bc | 3.03a | 3.37a |
| Nervous frequency | 2.21 bc | 2.62ac | 3.02ab |
| *Note.* superscript letters indicate a significant difference (p < .01) when compared to the lettered profile.  SWEMWBS= Shorter Warwick-Edinburgh Mental Wellbeing Scale  * *p* falls just below the 0.01 threshold (p=0.014) for the differnce between groups b and c | | | |

| ***1B) Mean mental health scores per social support profile when using SWEMWBS 6-item and the unclassified occupational class is treated as missing data (deleted list-wise)*** | | | |
| --- | --- | --- | --- |
|  | High (a) | Moderate (b) | Low friend (c) |
| SWEMWBS 6 | 23.97 bc | 21.71ac | 18.97ab |
| Sad frequency | 1.96 bc | 2.63ac | 3.12ab |
| Irritable frequency | 2.41 bc | 3.01ac | 3.44ab |
| Nervous frequency | 2.22 bc | 2.61ac | 3.14ab |
| *Note.* superscript letters indicate a significant difference (p < .01) when compared to the lettered profile.  SWEMWBS= Shorter Warwick-Edinburgh Mental Wellbeing Scale | | | |

| ***1C) Mean mental health scores per social support profile when using SWEMWBS 6-item and the unclassified occupational class is treated as missing data (imputed using FIML)*** | | | |
| --- | --- | --- | --- |
|  | High (a) | Moderate (b) | Low friend (c) |
| SWEMWBS 6 | 23.99 bc | 21.61ac | 19.16ab |
| Sad frequency | 1.94 bc | 2.67ac | 3.12 ab |
| Irritable frequency* | 2.40 bc | 3.04a | 3.39 a |
| Nervous frequency | 2.20 bc | 2.64ac | 3.05 ab |
| *Note.* superscript letters indicate a significant difference (p < .01) when compared to the lettered profile.  SWEMWBS= Shorter Warwick-Edinburgh Mental Wellbeing Scale  * *p* falls just below the 0.01 threshold (p=0.011) for differnce between groups b and c | | | |

| ***2A) Mean mental health scores per social support profile when using SWEMWBS 7 and the unclassified occupational class is treated as a distinct group*** | | | |
| --- | --- | --- | --- |
|  | High (a) | Moderate (b) | Low friend (c) |
| SWEMWBS 7 | 28.22 bc | 25.42ac | 22.06 ab |
| Sad frequency | 1.94 bc | 2.65 ac | 3.09 ab |
| Irritable frequency | 2.40 bc | 3.03 ac | 3.37 ab |
| Nervous frequency | 2.21 bc | 2.62 ac | 3.03 ab |
| *Note.* superscript letters indicate a significant difference (p < .01) when compared to the lettered profile.  SWEMWBS= Shorter Warwick-Edinburgh Mental Wellbeing Scale | | | |

| ***2B) Mean mental health scores per social support profile when using SWEMWBS 7 and the unclassified occupational class is treated as missing data (deleted list-wise)*** | | | |
| --- | --- | --- | --- |
|  | High (a) | Moderate (b) | Low friend (c) |
| SWEMWBS 7 | 28.18bc | 25.50 ac | 21.93 ab |
| Sad frequency | 1.96 bc | 2.63 ac | 3.12 ab |
| Irritable frequency | 2.41 bc | 3.00 ac | 3.44 ab |
| Nervous frequency | 2.22 bc | 2.61 ac | 3.14 ab |
| *Note.* superscript letters indicate a significant difference (p < .01) when compared to the lettered profile.  SWEMWBS= Shorter Warwick-Edinburgh Mental Wellbeing Scale | | | |

| ***2C) Mean mental health scores per social support profile when using SWEMWBS 7 and the unclassified occupational class is treated as missing data (imputed using FIML)*** | | | |
| --- | --- | --- | --- |
|  | High (a) | Moderate (b) | Low friend (c) |
| SWEMWBS 7 | 28.21 bc | 25.39 ac | 22.12 ab |
| Sad frequency | 1.94 bc | 2.67 ac | 3.12 ab |
| Irritable frequency | 2.40 bc | 3.04 ac | 3.40 ab |
| Nervous frequency | 2.20 bc | 2.63 ac | 3.06 ab |
| *Note.* superscript letters indicate a significant difference (p < .01) when compared to the lettered profile.  SWEMWBS= Shorter Warwick-Edinburgh Mental Wellbeing Scale | | | |

| ***3B) Mean mental health scores per social support profile, when using converted SWEMWBS 7 and the unclassified occupational class is treated as missing data (deleted list-wise)*** | | | |
| --- | --- | --- | --- |
|  | High (a) | Moderate (b) | Low friend (c) |
| Converted SWEMWBS 7 | 25.58 bc | 22.90 ac | 20.34 ab |
| Sad frequency | 1.96 bc | 2.64 ac | 3.11 ab |
| Irritable frequency | 2.41 bc | 3.01 ac | 3.43 ab |
| Nervous frequency | 2.22 bc | 2.61 ac | 3.14 ab |
| *Note.* superscript letters indicate a significant difference (p < .01) when compared to the lettered profile.  SWEMWBS= Shorter Warwick-Edinburgh Mental Wellbeing Scale | | | |

| ***3C) Mean mental health scores per social support profile, when using converted SWEMWBS 7 and the unclassified occupational class is treated as missing data (imputed using FIML)*** | | | |
| --- | --- | --- | --- |
|  | High (a) | Moderate (b) | Low friend (c) |
| Converted SWEMWBS 7 | 25.61 bc | 22.80 ac | 20.50 ab |
| Sad frequency | 1.94 bc | 2.67 ac | 3.11 ab |
| Irritable frequency | 2.40 bc | 3.04 ac | 3.38 ab |
| Nervous frequency | 2.20 bc | 2.64 ac | 3.05 ab |
| *Note.* superscript letters indicate a significant difference (p < .01) when compared to the lettered profile.  SWEMWBS= Shorter Warwick-Edinburgh Mental Wellbeing Scale | | | |

| ***4A) Mean mental health scores per social support profile, when using converted SWEMWBS DK and the unclassified occupational class is treated as a distinct group*** | | | |
| --- | --- | --- | --- |
|  | High (a) | Moderate (b) | Low friend (c) |
| SWEMWBS DK | 25.09 bc | 21.71ac | 19.09 ab |
| Sad frequency | 1.94 bc | 2.66 ac | 3.09 ab |
| Irritable frequency* | 2.40 bc | 3.04 a | 3.35 a |
| Nervous frequency* | 2.211 bc | 2.63 a | 3.01 a |
| *Note.* superscript letters indicate a significant difference (p < .01) when compared to the lettered profile.  SWEMWBS= Shorter Warwick-Edinburgh Mental Wellbeing Scale  * *p* falls just below the 0.01 threshold (p=0.022 for irritable; p=0.013 for nervous) for differnce between groups b and c | | | |

| ***4B) Mean mental health scores per social support profile, when using converted SWEMWBS DK and the unclassified occupational class is treated as missing data (deleted list-wise)*** | | | |
| --- | --- | --- | --- |
|  | High (a) | Moderate (b) | Low friend (c) |
| SWEMWBS DK | 25.05 bc | 21.79 ac | 18.96 ab |
| Sad frequency | 1.96 bc | 2.64 ac | 3.11 ab |
| Irritable frequency | 2.41 bc | 3.01 ac | 3.43 ab |
| Nervous frequency | 2.22 bc | 2.62 ac | 3.13 ab |
| *Note.* superscript letters indicate a significant difference (p < .01) when compared to the lettered profile.  SWEMWBS= Shorter Warwick-Edinburgh Mental Wellbeing Scale | | | |

| ***4C) Mean mental health scores per social support profile, when using converted SWEMWBS DK and the unclassified occupational class is treated as missing data (imputed using FIML)*** | | | |
| --- | --- | --- | --- |
|  | High (a) | Moderate (b) | Low friend (c) |
| SWEMWBS DK | 25.08 bc | 21.67 ac | 19.15 ab |
| Sad frequency | 1.94 bc | 2.67 ac | 3.11 ab |
| Irritable frequency* | 2.40 bc | 3.05 a | 3.38 a |
| Nervous frequency | 2.20 bc | 2.65 ac | 3.04 ab |
| *Note.* superscript letters indicate a significant difference (p < .01) when compared to the lettered profile.  SWEMWBS= Shorter Warwick-Edinburgh Mental Wellbeing Scale  * *p* falls just below the 0.01 threshold (p=0.015) for differnce between groups b and c. | | | |
